# Supplementary material for: The Relevance of General Spatial Anticipation Skills for Basketball Referees
Source: MDPI journal article supplement (doi:10.3390/app13052991), 2023-02-26
Supplement: s1 [file s1]

Supplementary material

Table S1. Pearson correlation matrix of the Vienna Test System results, age, and education.

|                               | Age   | Education | The Vienna Test System |                      |                    |                  |                        |
|-------------------------------|-------|-----------|------------------------|----------------------|--------------------|------------------|------------------------|
|                               |       |           | Time anticipation      | Spatial anticipation | Visual orientation | Perceptual speed | Spatial working memory |
| <i>Demographics</i>           |       |           |                        |                      |                    |                  |                        |
| Age                           | 1     | -.11      | .08                    | -.29*                | -.18               | .05              | -.07                   |
| Education                     | -.11  | 1         | -.01                   | -.06                 | .10                | -.03             | .15                    |
| <i>The Vienna Test System</i> |       |           |                        |                      |                    |                  |                        |
| Time anticipation             | .08   | -.07      | 1                      | .10                  | -.03               | .10              | .16                    |
| Spatial anticipation          | -.29* | -.06      | .10                    | 1                    | .02                | -.22             | -.21                   |
| Visual orientation            | -.18  | .10       | -.03                   | .02                  | 1                  | -.08             | -.17                   |
| Perceptual speed              | .46   | .03       | .10                    | -.22                 | -.08               | 1                | .25*                   |
| Spatial working memory        | -.07  | .15       | .16                    | -.21                 | -.17               | .25*             | 1                      |

Note: Education, 1 (*n* = 0) = No school diploma; 2 (*n* = 1) = Compulsory education; 3 (*n* = 10) = Middle school diploma; 4 (*n* = 14) = high school graduation; 5 (*n* = 61) = University degree; For time anticipation and spatial anticipation lower scores represent a better performance.

\**p* < 0.050

**Table S2.** Measures to control normal distribution, homoscedasticity assumption, internal consistency, and criterion validity of all tests.

|                               | <i>n</i> | <i>p</i> Shapiro Wilk test | <i>p</i> Levene tests | Cronbach's $\alpha$ | Criterion validity <i>r</i> |
|-------------------------------|----------|----------------------------|-----------------------|---------------------|-----------------------------|
| <i>The Vienna Test System</i> |          |                            |                       |                     |                             |
| Spatial working memory        | 86       | .020                       | .876                  | .791                | 0.21                        |
| Visual orientation            | 86       | <.001                      | .666                  | .890                | 0.33                        |
| Perceptual speed              | 69       | .647                       | .571                  | .740                | 0.37                        |
| Time anticipation             | 86       | <.001                      | .034                  | .962                | 0.29                        |
| Spatial anticipation          | 86       | .368                       | .130                  | .719                | 0.29                        |

*Note:*  $p < 0.050$  in the Shapiro Wilk and Levene test demonstrate a significant violation of the normal distribution and homoscedasticity respectively. Criterion validity was derived from the validation tests conducted by the creators<sup>1</sup> of the different cognitive tests.

<sup>1</sup> Schuhfried, G. (2013). Vienna Test System: Psychological Assessment. Moedling, Austria: Schuhfried

**Table S3.** Results of the overall non-parametric tests (Kruskal Wallis tests) for all performance scores between all groups.

|                               |          | Kruskal Wallis tests |                |
|-------------------------------|----------|----------------------|----------------|
|                               | <i>n</i> | <i>H</i> value       | <i>P</i> value |
| <i>The Vienna Test System</i> |          |                      |                |
| Spatial working memory        | 86       | 11.30                | .014           |
| Visual orientation            | 86       | 1.14                 | .565           |
| Perceptual speed              | 69       | 3.73                 | .155           |
| Time anticipation             | 86       | 5.576                | .056           |
| Spatial anticipation          | 86       | 22.47                | <.001          |

*Note:* *H* is the test statistic for the Kruskal Wallis test. Under the null hypothesis, the chi-square distribution approximates the distribution of *H*. The p-value of the spatial working memory task is not statistically significant after the Bonferroni correction.

**Table S4.** Results of pairwise comparisons (Kruskal Wallis Test) of the statistically significant performance scores between all groups.

|                        |                                 | Pairwise comparisons |         |                      |
|------------------------|---------------------------------|----------------------|---------|----------------------|
|                        |                                 | z value              | p value | Effect size <i>r</i> |
| Spatial working memory | Elite referees—amateur referees | 2.70                 | .021    | .529                 |
|                        | Elite referees—novices          | -0.25                | .998    | .049                 |
|                        | Amateur referees - novices      | 3.06                 | .007    | .558                 |
| Spatial anticipation   | Elite referees—amateur referees | -4.45                | <.001   | .872                 |
|                        | Elite referees - novices        | -3.76                | .001    | .737                 |
|                        | Amateur referees - novices      | -0.72                | .999    | .131                 |

*Note:* Effect size *r* is categorized as followed; 0.1 to 0.3: small effect; 0.3 to 0.5: medium effect; 0.5 and higher: large effect.
